# Supplementary material for: A comprehensive understanding on the anionic redox chemistry of high-voltage cathode materials for high-energy-density lithium-ion batteries
Source: Royal Society of Chemistry journal article supplement (doi:10.1039/d4cs00797b), 2025-01-01
Supplement: d4cs00797b1.pdf [file d4cs00797b1.pdf]

## Supplementary Information

### A comprehensive understanding on the anionic redox chemistry of high-voltage cathode materials for high-energy-density lithium-ion batteries

Qingyuan Li<sup>a,‡</sup>, Dong Zhou<sup>b,‡</sup>, Mihai Chu<sup>c</sup>, Zhongqing Liu<sup>d</sup>, Liangtao Yang<sup>e</sup>, Wei Wu<sup>e</sup>, De Ning<sup>e</sup>, Wenyuan Li<sup>a</sup>, Xingbo Liu<sup>a</sup>, Jie Li<sup>c,\*</sup>, Stefano Passerini<sup>f,h,\*</sup> and Jun Wang<sup>g,\*</sup>

<sup>a</sup>Benjamin M. Statler College of Engineering & Mineral Resources, West Virginia University, Morgantown, WV, 26506, USA

<sup>b</sup>School of Advanced Energy, Shenzhen Campus of Sun Yat-sen University, Shenzhen, 518107, P. R. China

<sup>c</sup>Department of Energy, Politecnico di Milano, Via Lambruschini 4, Milano, 20156, Italy

<sup>d</sup>Sodium Innovation Material Technology (SIMT) Co., Ltd., Wuxi, 214142, P. R. China

<sup>e</sup>Shenzhen Institutes of Advanced Technology, Chinese Academy of Sciences, Shenzhen, 518055, P. R. China

<sup>f</sup>Austrian Institute of Technology (AIT), Center for Transport Technologies, Giefinggasse 2, Wien, 1210, Austria

<sup>g</sup>School of Innovation and Entrepreneurship, Southern University of Science and Technology, Shenzhen, 518055, P. R. China

<sup>h</sup>Karlsruhe Institute of Technology (KIT), Helmholtz Institute Ulm (HIU), Helmholtzstr. 11, Ulm, 89081, Germany

\*Corresponding authors.

E-mail addresses: E-mail: [jie1.li@polimi.it](mailto:jie1.li@polimi.it) (J. Li); [stefano.passerini@ait.ac.at](mailto:stefano.passerini@ait.ac.at) (S. Passerini); [wangj9@sustech.edu.cn](mailto:wangj9@sustech.edu.cn) (J. Wang).

<sup>‡</sup>These authors contributed equally to this work.

**Table S1** Effects of different coating materials and thicknesses on the electrochemical performance of Li-rich oxides.<sup>1</sup>

| Material                                                                                                                         | Coating layer                                                                         | Coating thickness (nm) | Cutoff voltage (V) | 1 C (mA g <sup>-1</sup> ) | IDC <sup>a</sup> (mAh g <sup>-1</sup> ) / ICE <sup>b</sup> (%) / Rate (C) | DC <sup>c</sup> before cycling (mAh g <sup>-1</sup> ) / Cycle number/Retention (%) / Rate (C) | Ref. |
|----------------------------------------------------------------------------------------------------------------------------------|---------------------------------------------------------------------------------------|------------------------|--------------------|---------------------------|---------------------------------------------------------------------------|-----------------------------------------------------------------------------------------------|------|
| Li <sub>1.2</sub> Mn <sub>0.6</sub> Ni <sub>0.2</sub> O <sub>2</sub>                                                             | MnO <sub>x</sub>                                                                      | 20                     | 4.8                | 200                       | 298.1/90.2/1                                                              | 298.1/33/88.2/1                                                                               | 2    |
| Li <sub>1.2</sub> Mn <sub>0.567</sub> Ni <sub>0.167</sub> Co <sub>0.066</sub> O <sub>2</sub>                                     | MnO <sub>2</sub>                                                                      | 5                      | 4.8                | 200                       | 299/88/0.025                                                              | 280/50/90.3/0.1                                                                               | 3    |
| Li <sub>1.2</sub> Ni <sub>0.18</sub> Co <sub>0.04</sub> Mn <sub>0.58</sub> O <sub>2</sub>                                        | MnO <sub>2</sub>                                                                      | 10                     | 4.8                | 200                       | 294.4/88.8/0.1                                                            | 294.4/80/87.8/0.1                                                                             | 4    |
| Li <sub>1.2</sub> Ni <sub>0.15</sub> Mn <sub>0.55</sub> Co <sub>0.1</sub> O <sub>2</sub>                                         | MnO <sub>2</sub>                                                                      | -                      | 4.8                | 260                       | 226.0/83/0.1                                                              | 222.6/50/94/0.2                                                                               | 5    |
| Li <sub>1.2</sub> Mn <sub>0.54</sub> Co <sub>0.13</sub> Ni <sub>0.13</sub> O <sub>2</sub>                                        | MnO <sub>2</sub>                                                                      | 10-50                  | 4.8                | 250                       | 239.1/83.9/0.05                                                           | 181.5/100/88.2/0.5                                                                            | 6    |
| 0.5Li <sub>2</sub> MnO <sub>3</sub> -0.5LiNi <sub>0.44</sub> Mn <sub>0.32</sub> Co <sub>0.24</sub> O <sub>2</sub>                | Li <sub>2</sub> MnO <sub>3</sub>                                                      | 3                      | 4.8                | 250                       | 292.7/88.9/0.1                                                            | 231.9/100/94.1/1                                                                              | 7    |
| Li <sub>1.2</sub> Mn <sub>0.54</sub> Co <sub>0.13</sub> Ni <sub>0.13</sub> O <sub>2</sub>                                        | Li <sub>2</sub> MnO <sub>3</sub>                                                      | 10                     | 4.8                | 200                       | 292.7/88.7/0.1                                                            | 231.9/100/94.1/1                                                                              | 8    |
| Li <sub>1.2</sub> Mn <sub>0.54</sub> Co <sub>0.13</sub> Ni <sub>0.13</sub> O <sub>2</sub>                                        | Li <sub>2</sub> MnO <sub>3</sub>                                                      | 5                      | 4.8                | 300                       | 291.8/76.4/0.1                                                            | 197/100/76.9/1                                                                                | 9    |
| Li <sub>1.2</sub> Mn <sub>0.54</sub> Co <sub>0.13</sub> Ni <sub>0.13</sub> O <sub>2</sub>                                        | Li <sub>4</sub> Mn <sub>5</sub> O <sub>12</sub>                                       | 14                     | 4.7                | 250                       | 276/-/0.05                                                                | 276/300/83.1/0.2                                                                              | 10   |
| Li <sub>1.2</sub> Mn <sub>0.6</sub> Ni <sub>0.2</sub> O <sub>2</sub>                                                             | Li <sub>4</sub> Mn <sub>5</sub> O <sub>12</sub>                                       | 5                      | 4.8                | 200                       | 267.3/96.4/0.1                                                            | 232/300/80/0.5                                                                                | 11   |
| Li <sub>1.2</sub> Mn <sub>0.54</sub> Co <sub>0.13</sub> Ni <sub>0.13</sub> O <sub>2</sub>                                        | V <sub>2</sub> O <sub>5</sub>                                                         | 6                      | 4.8                | 250                       | 279.5/87.8/0.1                                                            | 279.5/50/96.3/0.1                                                                             | 12   |
| Li <sub>1.18</sub> Co <sub>0.15</sub> Ni <sub>0.15</sub> Mn <sub>0.52</sub> O <sub>2</sub>                                       | Li <sub>3</sub> VO <sub>4</sub>                                                       | 5                      | 4.8                | 200                       | 276.4/87.7/0.2                                                            | 126.2/100/78.6/5                                                                              | 13   |
| Li <sub>1.2</sub> Mn <sub>0.6</sub> Ni <sub>0.2</sub> O <sub>2</sub>                                                             | Li <sub>6</sub> V <sub>2</sub> O <sub>5</sub>                                         | 5                      | 4.8                | 200                       | -/87.7/0.1                                                                | 198/50/91.4/1                                                                                 | 14   |
| Li <sub>1.17</sub> Ni <sub>0.17</sub> Co <sub>0.10</sub> Mn <sub>0.56</sub> O <sub>2</sub>                                       | LiV <sub>3</sub> O <sub>8</sub>                                                       | 2-5                    | 4.6                | 250                       | 252.9/93.7/0.05                                                           | 231.5/100/94.3/0.05                                                                           | 15   |
| Li <sub>1.2</sub> Mn <sub>0.54</sub> Co <sub>0.13</sub> Ni <sub>0.13</sub> O <sub>2</sub>                                        | LiV <sub>3</sub> O <sub>8</sub>                                                       | 2.5                    | 4.8                | 250                       | 265.9/-/0.1                                                               | -/50/87.6/1                                                                                   | 16   |
| Li <sub>1.2</sub> Mn <sub>0.54</sub> Co <sub>0.13</sub> Ni <sub>0.13</sub> O <sub>2</sub>                                        | LiVO <sub>3</sub>                                                                     | 3                      | 4.8                | 250                       | -78.6/0.1                                                                 | -/400/84/1                                                                                    | 17   |
| 0.4Li <sub>4/3</sub> Mn <sub>2/3</sub> O <sub>2</sub> -0.6LiNi <sub>1/3</sub> Co <sub>1/3</sub> Mn <sub>1/3</sub> O <sub>2</sub> | Co <sub>3</sub> O <sub>4</sub>                                                        | 3-5                    | 4.8                | 200                       | 279.1/84.99/0.1                                                           | 197.4/80/94.1/0.5                                                                             | 18   |
| Li <sub>1.2</sub> Mn <sub>0.534</sub> Co <sub>0.133</sub> Ni <sub>0.133</sub> O <sub>2</sub>                                     | Co <sub>3</sub> O <sub>4</sub>                                                        | 15                     | 4.8                | 300                       | 271/79/0.1                                                                | 253.3/80/73.3/0.2                                                                             | 19   |
| Li <sub>1.2</sub> Mn <sub>0.54</sub> Co <sub>0.13</sub> Ni <sub>0.13</sub> O <sub>2</sub>                                        | LiFePO <sub>4</sub>                                                                   | -                      | 4.8                | 250                       | 279/94/0.1                                                                | 237/100/96/1                                                                                  | 20   |
| Li <sub>1.12</sub> Ni <sub>0.18</sub> Co <sub>0.07</sub> Mn <sub>0.57</sub> O <sub>2</sub>                                       | Li <sub>3</sub> V <sub>1.5</sub> Al <sub>0.5</sub> (PO <sub>4</sub> ) <sub>3</sub>    | 5-10                   | 4.8                | 250                       | 279/93/0.1                                                                | 228/100/96/1                                                                                  | 21   |
| Li <sub>1.2</sub> Mn <sub>0.54</sub> Co <sub>0.13</sub> Ni <sub>0.13</sub> O <sub>2</sub>                                        | Li <sub>4</sub> V <sub>2</sub> Mn(PO <sub>4</sub> ) <sub>4</sub>                      | 50                     | 4.8                | 250                       | 300/84.2/0.05                                                             | 196.1/200/78.1/1                                                                              | 22   |
| Li <sub>1.2</sub> Mn <sub>0.533</sub> Ni <sub>0.267</sub> O <sub>2</sub>                                                         | Li <sub>x</sub> CoPO <sub>4</sub>                                                     | 5                      | 4.9                | 250                       | -                                                                         | -/500/80.06/1                                                                                 | 23   |
| Li <sub>1.2</sub> Mn <sub>0.54</sub> Co <sub>0.13</sub> Ni <sub>0.13</sub> O <sub>2</sub>                                        | La <sub>1-x</sub> Sr <sub>x</sub> MnO <sub>3-y</sub>                                  | 5-8                    | 4.75               | 260                       | 243.5/80/0.1                                                              | 202/200/94/1                                                                                  | 24   |
| Li <sub>1.2</sub> Mn <sub>0.54</sub> Co <sub>0.13</sub> Ni <sub>0.13</sub> O <sub>2</sub>                                        | La <sub>2</sub> Li <sub>0.5</sub> Co <sub>0.5</sub> O <sub>4</sub>                    | 16                     | 4.8                | 250                       | 270.5/81.5/0.1                                                            | 204.2/200/82.6/1                                                                              | 25   |
| Li <sub>1.2</sub> Mn <sub>0.54</sub> Co <sub>0.13</sub> Ni <sub>0.13</sub> O <sub>2</sub>                                        | Li <sub>7</sub> La <sub>3</sub> Zr <sub>2</sub> O <sub>12</sub>                       | 10                     | 4.8                | -                         | 246.2/78.1/0.1                                                            | 246.2/100/86.3/0.1                                                                            | 26   |
| Li <sub>1.2</sub> Mn <sub>0.54</sub> Co <sub>0.13</sub> Ni <sub>0.13</sub> O <sub>2</sub>                                        | Li <sub>6.25</sub> La <sub>3</sub> Zr <sub>2</sub> Al <sub>0.25</sub> O <sub>12</sub> | -                      | 4.8                | 200                       | 282.4/85.6/0.1                                                            | 190.7/300/95.7/1                                                                              | 27   |
| Li <sub>1.2</sub> Mn <sub>0.54</sub> Co <sub>0.13</sub> Ni <sub>0.13</sub> O <sub>2</sub>                                        | Li <sub>0.5</sub> La <sub>0.5</sub> TiO <sub>3</sub>                                  | 4                      | 4.8                | -                         | 261.6/86.4/0.12                                                           | 226.5/100/-/0.12                                                                              | 28   |
| Li <sub>1.2</sub> Mn <sub>0.54</sub> Co <sub>0.13</sub> Ni <sub>0.13</sub> O <sub>2</sub>                                        | Li <sub>2</sub> MoO <sub>4</sub>                                                      | 20                     | 4.8                | 250                       | 257.31/77.79/0.1                                                          | -/100/81.85%/1                                                                                | 29   |
| Li <sub>1.2</sub> Mn <sub>0.6</sub> Ni <sub>0.2</sub> O <sub>2</sub>                                                             | LiNi <sub>0.5</sub> Mn <sub>1.5</sub> O <sub>4</sub>                                  | 2                      | 4.8                | 250                       | 261/80/0.1                                                                | 236/100/99.6%/0.5                                                                             | 30   |

|                                                                                                 |                                                                          |      |      |     |                       |                    |    |
|-------------------------------------------------------------------------------------------------|--------------------------------------------------------------------------|------|------|-----|-----------------------|--------------------|----|
| $\text{Li}_{1.2}\text{Mn}_{0.54}\text{Co}_{0.13}\text{Ni}_{0.13}\text{O}_2$                     | $\text{LiMn}_{1.4}\text{Ni}_{0.5}\text{M}$<br>$\text{o}_{0.1}\text{O}_4$ | 10   | 4.8  | 250 | 300/-/0.1             | 265/120/75/1       | 31 |
| $\text{Li}_{1.2}\text{Mn}_{0.56}\text{Ni}_{0.16}\text{Co}_{0.08}\text{O}_2$                     | $\text{Al}_2\text{O}_3$                                                  | 5    | 4.8  | 200 | 293.4/82.2/0.<br>1    | 261.8/100/89.2/0.5 | 32 |
| $\text{Li}_{1.2}\text{Mn}_{0.54}\text{Ni}_{0.13}\text{Co}_{0.13}\text{O}_2$                     | MgO                                                                      | 5-10 | 4.8  | 200 | 260.8/78.0/0.<br>1    | 243.1/100/96.4/1   | 33 |
| $\text{Li}_{1.2}\text{Mn}_{0.54}\text{Ni}_{0.13}\text{Co}_{0.13}\text{O}_2$                     | $\text{ZrO}_2$                                                           | -    | 4.8  | -   | 308.5/95.4/0.<br>1    | 291.5/170/68.7/0.2 | 34 |
| $\text{Li}_{1.2}\text{Mn}_{0.54}\text{Ni}_{0.13}\text{Co}_{0.13}\text{O}_2$                     | $\text{TiO}_2$                                                           | 6    | 4.8  | 300 | 254.6/82.4/0.<br>2    | 194.9/100/79.6/1   | 35 |
| $\text{Li}_{1.2}\text{Mn}_{0.54}\text{Ni}_{0.13}\text{Co}_{0.13}\text{O}_2$                     | $\text{CeO}_2$                                                           | 2    | 4.8  | -   | 282.2/68.0/0.<br>1    | 255.0/300/80.4/0.5 | 36 |
| $\text{Li}_{1.2}\text{Mn}_{0.54}\text{Ni}_{0.13}\text{Co}_{0.13}\text{O}_2$                     | $\text{MgAl}_2\text{O}_4$                                                | 6    | 4.8  | 250 | 252.0/80.1/0.<br>1    | 226.1/200/78.1/1   | 37 |
| $\text{Li}_{1.2}\text{Mn}_{0.54}\text{Ni}_{0.13}\text{Co}_{0.13}\text{O}_2$                     | $\text{NiFe}_2\text{O}_4$                                                | 15   | 4.75 | 260 | 259.8/87.2/0.<br>1    | 232.5/200/91.8/1   | 38 |
| $\text{Li}_{1.2}\text{Mn}_{0.54}\text{Ni}_{0.13}\text{Co}_{0.13}\text{O}_2$                     | $\text{La}_{0.9}\text{Sr}_{0.1}\text{CoO}_3$                             | 6    | 4.8  | 250 | 247.0/78.6/0.<br>05   | 162.5/400/80.0/1   | 39 |
| $\text{Li}_{1.2}\text{Mn}_{0.54}\text{Ni}_{0.13}\text{Co}_{0.13}\text{O}_2$                     | $\text{AlF}_3$                                                           | 5-7  | 4.8  | 300 | 283.3/88.3/0.<br>1    | 187.1/200/84.4/1   | 40 |
| $\text{Li}_{1.19}\text{Mn}_{0.57}\text{Ni}_{0.16}\text{Co}_{0.08}\text{O}_2$                    | $\text{AlF}_3$                                                           | -    | 4.6  | 200 | 240.6/96.3/0.<br>1    | 199.0/100/85.9/0.5 | 41 |
| $\text{Li}_{1.2}\text{Mn}_{0.54}\text{Ni}_{0.13}\text{Co}_{0.13}\text{O}_2$                     | $\text{MgF}_2$                                                           | -    | 4.8  | -   | 282.6/87.2/0.<br>05   | 256.0/200/80.0/0.5 | 42 |
| $\text{Li}_{1.2}\text{Mn}_{0.54}\text{Ni}_{0.13}\text{Co}_{0.13}\text{O}_2$                     | $\text{FeF}_3$                                                           | 5-15 | 4.8  | 250 | 280.0/80.0/0.<br>1    | 190.0/100/95.0/0.5 | 43 |
| $\text{Li}_{1.18}\text{Mn}_{0.52}\text{Ni}_{0.15}\text{Co}_{0.15}\text{O}_2$                    | $\text{BiOF}$                                                            | 3    | -    | 200 | 292.0/92.0/0.<br>2    | 292.0/100/92.0/0.2 | 44 |
| $\text{Li}_{1.2}\text{Fe}_{0.1}\text{Ni}_{0.15}\text{Mn}_{0.55}\text{O}_2$                      | $\text{AlPO}_4$                                                          | 8    | 4.8  | 200 | 267.2/78.9/0.<br>2    | 296.4/50/74.4/0.1  | 45 |
| $\text{Li}_{1.2}\text{Mn}_{0.54}\text{Ni}_{0.13}\text{Co}_{0.13}\text{O}_2$                     | $\text{FePO}_4$                                                          | 2-3  | 4.8  | 250 | 280.4/86.4/0.<br>1    | 268.4/100/86.8/0.2 | 46 |
| $\text{Li}_{1.2}\text{Mn}_{0.54}\text{Ni}_{0.13}\text{Co}_{0.13}\text{O}_2$                     | $\text{LaPO}_4$                                                          | 4-6  | 4.8  | 200 | 283.4/89.3/0.<br>1    | 249.8/200/83.2/1   | 47 |
| $\text{Li}_{1.2}\text{Mn}_{0.54}\text{Ni}_{0.13}\text{Co}_{0.13}\text{O}_2$                     | $\text{CePO}_4$                                                          | 20   | 4.6  | 200 | 275.3/84.6/0.<br>05   | 242.5/300/86.9/0.5 | 48 |
| $\text{Li}_{1.2}\text{Mn}_{0.56}\text{Ni}_{0.16}\text{Co}_{0.08}\text{O}_2$                     | $\text{La}(\text{PO}_3)_3$                                               | 6.9  | 4.8  | 230 | 286.1/-/0.05          | 227.4/100/94.2/0.1 | 49 |
| $\text{Li}_{1.2}\text{Mn}_{0.54}\text{Ni}_{0.13}\text{Co}_{0.13}\text{O}_2$                     | PAA                                                                      | 10   | 4.8  | 250 | 244.0/80.0/0.<br>1    | 220/100/97.7/0.4   | 50 |
| $\text{Li}_{1.2}\text{Mn}_{0.6}\text{Ni}_{0.2}\text{O}_2$                                       | PANI                                                                     | -    | 4.6  | -   | 262.0/75.8/0.<br>1    | 262.0/50/93.0/0.1  | 51 |
| $\text{Li}_{1.1}\text{Mn}_{0.67}\text{Ni}_{0.23}\text{O}_2$                                     | PPy                                                                      | 10   | 4.8  | 200 | -                     | 200.0/200/96.0/0.1 | 52 |
| $\text{Li}_{1.13}\text{Mn}_{0.463}\text{Ni}_{0.203}\text{Co}_{0.203}\text{O}_2$                 | FPI                                                                      | 15   | 4.8  | 135 | 248.0/73/0.2          | 248.0/50/94.0/0.2  | 53 |
| $\text{Li}_{1.17}\text{Mn}_{0.56}\text{Ni}_{0.175}\text{Co}_{0.095}\text{O}_2$                  | PEDOT/PSS                                                                | 5-8  | 4.6  | -   | 265.0/89.8/0.<br>05   | 220.0/50/67.3/1    | 54 |
| $0.4\text{Li}_2\text{MnO}_3 \cdot 0.6\text{LiNi}_{1/3}\text{Co}_{1/3}\text{Mn}_{1/3}\text{O}_2$ | Graphene oxide                                                           | 2-3  | 4.6  | 200 | 247.0/99.5/0.<br>1    | 227.0/100/78.0/1   | 55 |
| $\text{Li}_{1.2}\text{Mn}_{0.54}\text{Ni}_{0.13}\text{Co}_{0.13}\text{O}_2$                     | Graphene oxide                                                           | 5    | 4.8  | 250 | 313.0/110.2/0.<br>.05 | 268.0/50/75.0/0.2  | 56 |
| $\text{Li}_{1.2}\text{Mn}_{0.6}\text{Ni}_{0.2}\text{O}_2$                                       | $\text{SiO}_2$                                                           | 2    | 4.8  | 200 | 271.0/73.8/0.<br>1    | 238.3/50/~100/0.2  | 57 |
| $\text{Li}_{1.2}\text{Mn}_{0.6}\text{Ni}_{0.2}\text{O}_2$                                       | B-Ni                                                                     | 1-3  | 4.8  | 250 | 248.3/86.7/0.         | 207.0/400/91.1/1   | 58 |

|                                                                               |                                        |     |     |     |                 |                    |    |  |
|-------------------------------------------------------------------------------|----------------------------------------|-----|-----|-----|-----------------|--------------------|----|--|
|                                                                               | complexes                              |     |     |     | 2               |                    |    |  |
| $\text{Li}_{1.2}\text{Mn}_{0.54}\text{Ni}_{0.13}\text{Co}_{0.13}\text{O}_2$   | Potassium Prussian blue                | 3-4 | 4.8 | 200 | 281.7/85.69/0.1 | 229.1/100/77.2/0.5 | 59 |  |
| $\text{Li}_{1.17}\text{Ni}_{0.20}\text{Co}_{0.05}\text{Mn}_{0.58}\text{O}_2$  | Mn-MOFs                                | 2-3 | 4.8 | 300 | 323.8/91.1/0.1  | 323.8/100/87.7/0.1 | 60 |  |
| $\text{Li}_{1.2}\text{Mn}_{0.54}\text{Ni}_{0.13}\text{Co}_{0.13}\text{O}_2$   | $\text{Al}_2\text{O}_3/\text{AlF}_3$   | -   | 4.8 | 250 | 240.0/83.8/0.05 | 147.0/200/84.0/1   | 61 |  |
| $\text{Li}_{1.2}\text{Mn}_{0.54}\text{Ni}_{0.13}\text{Co}_{0.13}\text{O}_2$   | $\text{CaF}_2/\text{Graphite}$         | 100 | 4.8 | -   | 269.6/71.5/0.1  | 215.2/150/90.0/0.5 | 62 |  |
| $\text{Li}_{1.2}\text{Mn}_{0.54}\text{Ni}_{0.13}\text{Co}_{0.13}\text{O}_2$   | $\text{Al}_2\text{O}_3/\text{PPy}$     | -   | 4.8 | 250 | 281.4/80.4/0.1  | 230.0/100/90.7/1   | 63 |  |
| $\text{Li}_{1.2}\text{Mn}_{0.585}\text{Ni}_{0.185}\text{Fe}_{0.03}\text{O}_2$ | $\text{AlPO}_4/\text{Li}_3\text{PO}_4$ | 4   | 4.8 | 200 | 260.7/85.0/0.1  | 233.5/200/74.8/0.2 | 64 |  |

<sup>a</sup>DC represents initial discharge capacity; <sup>b</sup>ICE represents initial Coulombic efficiency; <sup>c</sup>DC represents discharge capacity.

**Table S2** Effects of different coating materials and thicknesses on electrochemical performance in LCO oxides.

| Material                                                                           | Coating layer                                                                                                         | Coating thickness (nm) | 1 C (mA g <sup>-1</sup> ) | Cutoff voltage (V) | Cyclability (capacity retention-cycles-rate) | Rate capability (mAh g <sup>-1</sup> rates) | Ref. |
|------------------------------------------------------------------------------------|-----------------------------------------------------------------------------------------------------------------------|------------------------|---------------------------|--------------------|----------------------------------------------|---------------------------------------------|------|
| LCO                                                                                | Al <sub>2</sub> O <sub>3</sub>                                                                                        | 20                     | -                         | 4.5                | 98.6%-200-2C                                 | 163-2C                                      | 65   |
|                                                                                    | LiMgPO <sub>4</sub>                                                                                                   | 5-10                   | -                         | 4.65               | 71.76%-200-1C                                | 120.8-5C                                    | 66   |
|                                                                                    | Mg <sub>3</sub> (PO <sub>4</sub> ) <sub>2</sub>                                                                       | 15                     | 274                       | 4.6                | 79%-1000-1C                                  | 168-5C                                      | 67   |
|                                                                                    | LiCoPO <sub>4</sub>                                                                                                   | 7                      | 180                       | 4.5                | 89.5%-50-1C                                  | 189-1C                                      | 68   |
|                                                                                    | Li <sub>3</sub> PO <sub>4</sub>                                                                                       | 30-40                  | 274                       | 4.6                | 96.7%-100-0.1C                               | 133.7-5C                                    | 69   |
|                                                                                    | Li <sub>3</sub> PO <sub>4</sub> and Mg <sup>2+</sup> Y <sup>3+</sup> doping                                           | 10                     | 274                       | 4.6                | 79.2-300-0.5C                                | 109.6-10C                                   | 70   |
|                                                                                    | LiZr <sub>2</sub> (PO <sub>4</sub> ) <sub>3</sub>                                                                     | -                      | 274                       | 4.55               | 72.2%-100-0.5C                               | 90-5C                                       | 71   |
|                                                                                    | AlPO <sub>4</sub> -5 zeolite                                                                                          | 10                     | -                         | 4.6                | 90%-200-1C                                   | 108-10C                                     | 72   |
|                                                                                    | Li <sub>1.5</sub> Al <sub>0.5</sub> Ti <sub>1.5</sub> (PO <sub>4</sub> ) <sub>3</sub>                                 | 22                     | 274                       |                    | 97.6%-100-0.5C                               | 150-5C                                      | 73   |
|                                                                                    | LiAlO <sub>2</sub>                                                                                                    | 3                      | 270                       | 4.7                | 85.8%-300-1C                                 | 128-10 C                                    | 74   |
|                                                                                    | TiO <sub>2</sub>                                                                                                      | 4.2                    | -                         | 4.6                | 92%-50-0.5C                                  | 190.9-3C                                    | 75   |
|                                                                                    | La-Y-O composite                                                                                                      | 5                      | 140                       | 4.6                | 94.4%-300-1C                                 | 145.3-20C                                   | 76   |
|                                                                                    | LiF                                                                                                                   | 1                      | -                         | 4.6                | 92%-1000-3C                                  | 141-10C                                     | 77   |
|                                                                                    | LiF                                                                                                                   | 2.25                   | 274                       | 4.6                | 80.5-700-0.5C                                | 124.9-3 C                                   | 78   |
|                                                                                    | Li <sub>3</sub> PO <sub>4</sub> /CoP                                                                                  | 15                     | 274                       | 4.6                | 80.9%-200-0.5C                               | 74.8-10 C                                   | 79   |
|                                                                                    | Li <sub>2</sub> TiO <sub>3</sub>                                                                                      | 10                     | 220                       | 4.6                | 80.5%-400-1C                                 | 112-10 C                                    | 80   |
|                                                                                    | Co <sub>3</sub> O <sub>4</sub> @Li <sub>6.4</sub> La <sub>3</sub> Zr <sub>1.4</sub> Ta <sub>0.6</sub> O <sub>12</sub> | 10-15                  | 160                       | 4.2                | 70.4%-300-2C                                 | 110-5C                                      | 81   |
|                                                                                    | Li <sub>2</sub> ZrF <sub>6</sub>                                                                                      | 6-13                   | -                         | 4.5                | 80.5%-1500-70 mA g <sup>-1</sup>             | 96.2-700 mA g <sup>-1</sup>                 | 82   |
|                                                                                    | LiF&Li <sub>x</sub> B <sub>y</sub> O <sub>z</sub>                                                                     | 2                      | 200                       | 4.6                | 81.7%-300-2C                                 | 151.3-5C                                    | 83   |
|                                                                                    | La <sub>2</sub> O <sub>3</sub> -ZrO <sub>2</sub>                                                                      | 9                      | 140                       | 4.5                | 90.3%-200-1C                                 | 165.6-10C                                   | 84   |
| Li <sub>x</sub> PO <sub>y</sub> F <sub>z</sub>                                     | 5-10                                                                                                                  | -                      | 4.6                       | 82.9%-500-1C       | 120.9-5C                                     | 85                                          |      |
| Mg <sup>2+</sup> , F <sup>-</sup> doping and PO <sub>4</sub> <sup>3-</sup> coating | 2-5                                                                                                                   | 274                    | 4.7                       | 81%-200-1C         | 113.5-10C                                    | 86                                          |      |

**Table S3** Comparative analysis of W, Zr and Nb element doping modifications in LCO.

| Doping Element | Key Mechanisms                                                                                                                                                                                                                                                   | Benefits                                                                                                       | Challenges                                                                                                                                                                     |
|----------------|------------------------------------------------------------------------------------------------------------------------------------------------------------------------------------------------------------------------------------------------------------------|----------------------------------------------------------------------------------------------------------------|--------------------------------------------------------------------------------------------------------------------------------------------------------------------------------|
| Tungsten (W)   | <ul style="list-style-type: none"><li>Improves structural stability by increasing interlayer spacing and reducing particle size.</li><li>Enhances Li<sup>+</sup> diffusion kinetics.</li></ul>                                                                   | <ul style="list-style-type: none"><li>High electrochemical performance.</li><li>Improved cycle life.</li></ul> | <ul style="list-style-type: none"><li>Potential for WO<sub>3</sub> impacting Li<sup>+</sup> diffusion.</li><li>Precise control of W doping concentration is crucial.</li></ul> |
| Zirconium (Zr) | <ul style="list-style-type: none"><li>Suppresses O oxidation and Co reduction.</li><li>Enhances crystal structural stability.</li><li>Promotes Li<sup>+</sup> diffusion.</li></ul>                                                                               | <ul style="list-style-type: none"><li>Improved rate capability.</li><li>Enhanced thermal stability.</li></ul>  | <ul style="list-style-type: none"><li>May require careful optimization of Zr doping levels to avoid detrimental effects.</li></ul>                                             |
| Niobium (Nb)   | <ul style="list-style-type: none"><li>Enhances structural stability through strong Nb-O bonds.</li><li>Lowers charge transfer resistance.</li><li>Promotes Li<sup>+</sup> diffusion.</li><li>Improves electronic conductivity.</li><li>Stabilizes CEI.</li></ul> | <ul style="list-style-type: none"><li>Enhanced rate capability.</li><li>Improved cycling stability.</li></ul>  | <ul style="list-style-type: none"><li>Potential for Nb to induce phase transformations if not carefully controlled.</li></ul>                                                  |

**Table S4** Effects of different coating materials and thicknesses on electrochemical performance in Ni-rich oxides.<sup>87</sup>

| Material                                                                                | Coating layer                                                                       | Coating thickness (nm) | 1 C (mA g <sup>-1</sup> ) | Cutoff voltage (V) | Rate performance (RT) <sup>a)</sup> current-capacity / mAh g <sup>-1</sup> | Cycling performance (RT) current-cycles-capacity retention | Ref. |
|-----------------------------------------------------------------------------------------|-------------------------------------------------------------------------------------|------------------------|---------------------------|--------------------|----------------------------------------------------------------------------|------------------------------------------------------------|------|
| SC <sup>b)</sup> LiNi <sub>0.6</sub> Co <sub>0.1</sub> Mn <sub>0.3</sub> O <sub>2</sub> | LiBO <sub>2</sub> with B doping                                                     | 10-30                  | 180                       | 4.5                | 5C-138 (RT); 1C-195.8 (45°C)                                               | 5C-1000-70.75%                                             | 88   |
| SC LiNi <sub>0.83</sub> Co <sub>0.11</sub> Mn <sub>0.06</sub> O <sub>2</sub>            | Li <sub>3</sub> BO <sub>3</sub> with Zr doping                                      | 5                      | –                         | 4.6                | -                                                                          | 1C-200-83.9%                                               | 89   |
| SC NCM622 <sup>c)</sup>                                                                 | LiBO <sub>2</sub> -B <sub>2</sub> O <sub>3</sub>                                    | 15                     | 175                       | 4.5/4.7            | 1C-160.8 (4.5 V); 1C-167.4 (4.7 V)                                         | 1C-200-88.5% (4.5 V); 1C-200-80% (4.7 V)                   | 90   |
| NCM811 <sup>d)</sup>                                                                    | LiAlO <sub>2</sub>                                                                  | 3                      | –                         | 4.5                | 5 C-165                                                                    | 5C-200-64.5%-                                              | 91   |
| NCM622                                                                                  | LiAlO <sub>2</sub> &GO                                                              | 5-7                    | 200                       | 4.5                | 10C-100.4                                                                  | 1C-200-88%;                                                | 92   |
| NCM622                                                                                  | N-doped LiAlO <sub>2</sub>                                                          | 2                      | 210                       | 4.5                | 10C-154                                                                    | 1C-450-87.0%                                               | 93   |
| NCM622                                                                                  | LiAlO <sub>2</sub>                                                                  | 1                      | 250                       | 4.5/4.7            | 3C-142 (4.5V); 3C-115 (4.7V)                                               | 0.2C-350-75.7% (4.5 V)                                     | 94   |
| NCM811                                                                                  | Li <sub>5</sub> AlO <sub>4</sub> &LiAlO <sub>2</sub>                                | 23                     | 280                       | 4.5                | 10-137.2                                                                   | 1C-50-83.9%                                                | 95   |
| NCM622                                                                                  | LiAlO <sub>2</sub> /LiF&AlF <sub>3</sub>                                            | 6                      | –                         | 4.5                | 10C-155.3                                                                  | 1C-200-93.01%                                              | 96   |
| SC NCM622                                                                               | Li-Si-O                                                                             | 8                      | 180                       | 4.5                | 1C-183.9                                                                   | 1C-100-90.6%                                               | 97   |
| NCM622                                                                                  | LiAlO <sub>2</sub> /Si <sub>1-x</sub> AlxO <sub>2</sub>                             | 7                      | –                         | 4.5                | 10C-153.4                                                                  | 5C-500-78.5%                                               | 98   |
| NCM811                                                                                  | β-LiAlSiO <sub>4</sub>                                                              | 15                     | 180                       | 4.5                | -                                                                          | 1C-100-83.4% (25°C); 1C-100-86.5% (55°C)                   | 99   |
| NMC622                                                                                  | Li <sub>2</sub> TiO <sub>3</sub> &PO <sub>4</sub> <sup>3-</sup> doping              | 5                      | –                         | 4.5                | 5C-167.2; 10C-157.8                                                        | 1C-800-77.4%                                               | 100  |
| NCM622                                                                                  | TiO <sub>x</sub> and Li <sub>x</sub> Ti <sub>y</sub> O <sub>2</sub>                 | <5                     | 180                       | 4.6                | –                                                                          | 1C-100-67%                                                 | 101  |
| NCM811                                                                                  | Li <sub>2</sub> MnO <sub>3</sub>                                                    | 6.6-14.1               | 200                       | 4.6                | –                                                                          | 1C-100-90.6%                                               | 102  |
| NCM622                                                                                  | Li <sub>8</sub> ZrO <sub>6</sub> and Li <sub>2</sub> ZrO <sub>3</sub>               | 12.5                   | 175                       | 4.5                | 5C-176.5                                                                   | 1C-100-91.1%                                               | 103  |
| NMC622                                                                                  | Li <sub>x</sub> Zr <sub>y</sub> O                                                   | 2.2                    | 180                       | 4.5                | 5C-91; 7C-50                                                               | 3C-100-68%                                                 | 104  |
| NCM622                                                                                  | ZrO <sub>2</sub>                                                                    | 5                      | 180                       | 4.5                | 10C-112.7                                                                  | 0.5C-100-82.5%; 2C-100-79%                                 | 105  |
| NCM622                                                                                  | Li <sub>6.1</sub> La <sub>3</sub> Al <sub>0.3</sub> Zr <sub>2</sub> O <sub>12</sub> | 6-12                   | 200                       | 4.5                | 2C-165.5                                                                   | 2C-100-84.6%; 10C-100-54.7%                                | 106  |
| NCM811                                                                                  | Nb doping & LiNbO <sub>3</sub>                                                      | 7                      | 180                       | 4.5                | -                                                                          | 1C-200-80.5%                                               | 107  |
| NCM811                                                                                  | Li <sub>2</sub> MoO <sub>4</sub>                                                    | 3-4                    | 200                       | 4.5                | -                                                                          | 1C-100-98.1% (4.5V, 55°C)                                  | 108  |
| NCM811                                                                                  | Li <sub>2</sub> SnO <sub>3</sub>                                                    | 4-5                    | 250                       | 4.5                | 5C-150                                                                     | 0.2C-100-99%                                               | 109  |
| NCM622                                                                                  | Li <sub>2</sub> SnO <sub>3</sub> &Sn <sup>4+</sup> gradient doping                  | 5                      | 195                       | 4.5                | 5C-136.2                                                                   | 1C-100-88.31%                                              | 110  |
| NCM811                                                                                  | Li <sub>x</sub> WO <sub>y</sub>                                                     | 5                      | 210                       | 4.5                | 5C-165.5 (RT)                                                              | 1C-100-88.4%; 1C-100-49.6%                                 | 111  |
| NCM811                                                                                  | Li <sub>3</sub> PO <sub>4</sub>                                                     | 10                     | 200                       | 4.5                | 10C-148.8                                                                  | 1C-100-88.4%                                               | 112  |
| NCM811                                                                                  | Li <sub>3</sub> PO <sub>4</sub>                                                     | 13.6                   | –                         | 4.8                | 1C-90                                                                      | 1C-300-80%                                                 | 113  |

|                                                                |                                                                        |      |     |     |                        |                                               |     |
|----------------------------------------------------------------|------------------------------------------------------------------------|------|-----|-----|------------------------|-----------------------------------------------|-----|
| NCM811                                                         | $\text{Li}_n(\text{TM})_m\text{PO}_4$ (TM = Ni, Co, and Mn)            | 4-6  | 200 | 4.5 | 10C-140 (25°C)         | 1C-300-80.36% (25°C);<br>1C-200-61.22% (55°C) | 114 |
| $\text{LiNi}_{0.87}\text{Co}_{0.1}\text{Al}_{0.03}\text{O}_2$  | $\text{Li}_2\text{O-BPO}_4$                                            | 10   | 200 | 4.7 | -                      | 1C-100-76.2%                                  | 115 |
| NCM622                                                         | $\text{Li}_{1.4}\text{Al}_{0.4}\text{Ti}_{1.6}(\text{PO}_4)_3$         | -    | 190 | 4.5 | 10C-152.6              | 1C-100-90.9%                                  | 116 |
| SC $\text{LiNi}_{0.6}\text{Co}_{0.1}\text{Mn}_{0.3}\text{O}_2$ | $\text{Li}_{1.5}\text{Al}_{0.5}\text{Ge}_{1.5}\text{P}_3\text{O}_{12}$ | 2    | -   | 4.6 | 10C-112.4 (4.4V, 55°C) | 5C-500-81.8(4.6V, RT)                         | 117 |
| SC-NCM811                                                      | $\text{Li}_{1.5}\text{Al}_{0.5}\text{Ge}_{1.5}(\text{PO}_4)_3$         | 15   | -   | 4.5 | 5C-175                 | 0.2C-100-94.5%; 1C-400-83.1%                  | 118 |
| NCM811                                                         | $\text{Li}_{1.5}\text{Al}_{0.5}\text{Zr}_{1.5}(\text{PO}_4)_3$         | 4    | 200 | 4.5 | -                      | 1C-200-84.8%                                  | 119 |
| $\text{LiNi}_{0.90}\text{Co}_{0.05}\text{Mn}_{0.05}\text{O}_2$ | $\text{Li}_4\text{TeO}_5$                                              | 4    | 200 | 4.5 | 5C-184.8               | 1C-200-82.12%                                 | 120 |
| NCM811                                                         | $\text{TiO}_2$                                                         | -    | 200 | 4.5 | 10C-135                | 1C-200-88.5%                                  | 121 |
| $\text{LiNi}_{0.83}\text{Co}_{0.11}\text{Mn}_{0.06}\text{O}_2$ | $\text{Li}_2\text{WO}_4$                                               | 5-10 | 200 | 4.5 | 10C-172                | 1C-150-98.1%                                  | 122 |

a) RT (Room Temperature); b) SC (Single Crystal); c) NCM622 ( $\text{LiNi}_{0.6}\text{Mn}_{0.2}\text{Co}_{0.2}\text{O}_2$ ); d) NCM811 ( $\text{LiNi}_{0.8}\text{Mn}_{0.1}\text{Co}_{0.1}\text{O}_2$ ).



## References

1. Q. Wang, L. Liu, H. Li, G. Yang, A. N. Alodhayb and J. Ma, *J. Mater. Sci. Technol.*, 2025, **207**, 274-294.
2. F. Wu, N. Li, Y. Su, H. Lu, L. Zhang, R. An, Z. Wang, L. Bao and S. Chen, *J. Mater. Chem.*, 2012, **22**, 1489-1497.
3. S. Guo, H. Yu, P. Liu, X. Liu, D. Li, M. Chen, M. Ishida and H. Zhou, *J. Mater. Chem. A*, 2014, **2**, 4422-4428.
4. Y. Jin, Y. Xu, X. Sun, L. Xiong and S. Mao, *Appl. Surf. Sci.*, 2016, **384**, 125-134.
5. D. Yu, P. Zhu, C. Hu, X. Huang, K. Tang and J. Wang, *J. Phys. Chem. Lett.*, 2023, **14**, 10959-10966.
6. Z. Li, P. Yang, Z. Zheng, Q. Pan, Y. Liu, Y. Li and J. Xuan, *Micromachines*, 2021, **12**, 1410.
7. S. Kim, W. Cho, X. Zhang, Y. Oshima and J. W. Choi, *Nat. Commun.*, 2016, **7**, 13598.
8. Y. Xie, S. Chen, W. Yang, H. Zou, Z. Lin and J. Zhou, *J. Alloys Compd.*, 2019, **772**, 230-239.
9. Y. Li, J. Zhang, R. Hong and N. Liu, *Ind. Eng. Chem. Res.*, 2022, **61**, 1133-1139.
10. X. D. Zhang, J. L. Shi, J. Y. Liang, Y. X. Yin, J. N. Zhang, X. Q. Yu and Y. G. Guo, *Adv. Mater.*, 2018, **30**, 1801751.
11. W. Zhu, Z. Tai, C. Shu, S. Chong, S. Guo, L. Ji, Y. Chen and Y. Liu, *J. Mater. Chem. A*, 2020, **8**, 7991-8001.
12. H. He, L. Zan and Y. Zhang, *J. Alloys Compd.*, 2016, **680**, 95-104.
13. Q. Fu, F. Du, X. Bian, Y. Wang, X. Yan, Y. Zhang, K. Zhu, G. Chen, C. Wang and Y. Wei, *J. Mater. Chem. A*, 2014, **2**, 7555-7562.
14. S.-X. Liao, C.-H. Shen, Y.-J. Zhong, W.-H. Yan, X.-X. Shi, S.-S. Pei, X. Guo, B.-H. Zhong, X.-L. Wang and H. Liu, *RSC Adv.*, 2014, **4**, 56273-56278.
15. H. Meng, L. Li, J. Liu, X. Han, W. Zhang, X. Liu and Q. Xu, *J. Alloys Compd.*, 2017, **690**, 256-266.
16. C.-S. Xu, H.-T. Yu, C.-F. Guo, Y. Xie, N. Ren, T.-F. Yi and G.-X. Zhang, *Ionics*, 2019, **25**, 4567-4576.
17. Y. Qu, W. Tang, H. Liu, C. Li, L. Zou, Z. Chen, Z. Yang, J. Su and W. Zhang, *Ind. Eng. Chem. Res.*, 2023, **62**, 10467-10476.
18. Y. Jin, Y. Xu, L. Xiong, X. Sun, L. Li and L. Li, *Solid State Ionics*, 2017, **310**, 62-70.
19. Y. Li, H. Huang, J. Yu, Y. Xia, C. Liang, Y. Gan, J. Zhang and W. Zhang, *J. Alloys Compd.*, 2019, **783**, 349-356.
20. B. Seteni, N. Rapulenyane, J. C. Ngila, S. Mpelane and H. Luo, *J. Power Sources*, 2017, **353**, 210-220.
21. K. Shi, K. Liang, J. Zheng and Y. Qiu, *Appl. Surf. Sci.*, 2019, **483**, 1-9.
22. S.-q. Yang, P.-b. Wang, H.-x. Wei, L.-b. Tang, X.-h. Zhang, Z.-j. He, Y.-j. Li, H. Tong and J.-c. Zheng, *Nano Energy*, 2019, **63**, 103889.
23. G. Zhou, D. Zhang, Y. Zhang, W. Wang, T. Uchiyama, C. Zhang, Y. Uchimoto and W. Wei, *ACS Appl. Mater. Interfaces*, 2023, **15**, 19055-19065.
24. S. Hu, Y. Li, Y. Chen, J. Peng, T. Zhou, W. K. Pang, C. Didier, V. K. Peterson, H. Wang, Q. Li and Z. Guo, *Adv. Energy Mater.*, 2019, **9**, 1901795.
25. X. Deng, M. Li, Z. Ma and X. Wang, *Nano Res.*, 2023, **16**, 10634-10643.
26. C. Shen, Y. Liu, W. Li, X. Liu, J. Xie, J. Jiang, Y. Jiang, B. Zhao and J. Zhang, *J. Colloid Interface Sci.*, 2022, **615**, 1-9.
27. Y. Wei, J. Cheng, D. Li, Y. Li, Z. Zeng, H. Liu, H. Zhang, F. Ji, X. Geng, J. Lu and L. Ci, *Adv. Funct. Mater.*, 2023, **33**, 2214775.
28. H. Zhang, T. Yang, Y. Han, D. Song, X. Shi, L. Zhang and L. Bie, *J. Power Sources*, 2017, **364**, 272-279.
29. S. Zhang, Y. Ye, Z. Chen, Q. Lai, T. Liu, Q. Wang and S. Yuan, *Materials*, 2023, **16**, 5655.
30. X. Ding, L.-N. Xiao, Y.-X. Li, Z.-F. Tang, J.-W. Wan, Z.-Y. Wen and C.-H. Chen, *J. Power Sources*,

- 2018, **390**, 13-19.
31. F. Wu, N. Li, Y. Su, H. Shou, L. Bao, W. Yang, L. Zhang, R. An and S. Chen, *Adv. Mater.*, 2013, **25**, 3722-3726.
  32. T. Wang, Z. Huang, M. Cai and S. Shi, *Mater. Lett.*, 2020, **279**, 128479.
  33. S. J. Shi, J. P. Tu, Y. Y. Tang, X. Y. Liu, Y. Q. Zhang, X. L. Wang and C. D. Gu, *Electrochim. Acta*, 2013, **88**, 671-679.
  34. S. Dong, X. He, Q. Xu, L. Ma, C. Hai and Y. Zhou, *Langmuir*, 2023, **39**, 7723-7730.
  35. X. Ran, J. Tao, Z. Chen, Z. Yan, Y. Yang, J. Li, Y. Lin and Z. Huang, *Electrochim. Acta*, 2020, **353**, 135959.
  36. B. Wang, L. Lu, Y. Hu, L. Chen and H. Jiang, *New J. Chem.*, 2023, **47**, 2173-2176.
  37. M. Li, X. Deng, Z. Wang, K. Liu, Z. Ma, J. Wang and X. Wang, *Appl. Surf. Sci.*, 2022, **592**, 153328.
  38. J. Peng, Y. Li, Z. Chen, G. Liang, S. Hu, T. Zhou, F. Zheng, Q. Pan, H. Wang, Q. Li, J. Liu and Z. Guo, *ACS Nano*, 2021, **15**, 11607-11618.
  39. Y. Lei, Y. Elias, Y. Han, D. Xiao, J. Lu, J. Ni, Y. Zhang, C. Zhang, D. Aurbach and Q. Xiao, *ACS Appl. Mater. Interfaces*, 2022, **14**, 49709-49718.
  40. J. Zhang, D. Zhang, Z. Wang, F. Zheng, R. Zhong and R. Hong, *J. Mater. Sci.*, 2023, **58**, 4525-4540.
  41. Y.-K. Sun, M.-J. Lee, C. S. Yoon, J. Hassoun, K. Amine and B. Scrosati, *Adv. Mater.*, 2012, **24**, 1192-1196.
  42. K. Yang, B. Niu, Y. Liu, J. Zhong and J. Li, *Int. J. Electrochem. Sci.*, 2019, **14**, 3139-3152.
  43. C.-D. Li, J. Xu, J.-S. Xia, W. Liu, X. Xiong and Z.-A. Zheng, *Solid State Ionics*, 2016, **292**, 75-82.
  44. X. Bian, Q. Fu, Q. Pang, Y. Gao, Y. Wei, B. Zou, F. Du and G. Chen, *ACS Appl. Mater. Interfaces*, 2016, **8**, 3308-3318.
  45. F. Wu, X. Zhang, T. Zhao, L. Li, M. Xie and R. Chen, *ACS Appl. Mater. Interfaces*, 2015, **7**, 3773-3781.
  46. J. He, Z. Bai, X. Huang, Z. Zhang, L. Lu and J. Li, *J. Solid State Electrochem.*, 2023, **27**, 171-182.
  47. X. Zhang, X. Xie, R. Yu, J. Zhou, Y. Huang, S. Cao, Y. Wang, K. Tang, C. Wu and X. Wang, *ACS Appl. Energy Mater.*, 2019, **2**, 3532-3541.
  48. F. Meng, H. Guo, Z. Wang, X. Li and Y. Deng, *Ionics*, 2020, **26**, 2117-2127.
  49. M. Zhou, J. Zhao, X. Wang, J. Shen, W. Tang, Y. Deng and R. Liu, *Chin. Chem. Lett.*, 2023, **34**, 107793.
  50. J. Yang, P. Li, F. Zhong, X. Feng, W. Chen, X. Ai, H. Yang, D. Xia and Y. Cao, *Adv. Energy Mater.*, 2020, **10**, 1904264.
  51. L. Sun, X. Yi, C. Shi, X. Ren, Y. Gao, Y. Li and P. Zhang, *Int. J. Electrochem. Sci.*, 2017, **12**, 4756-4767.
  52. P. Vahdatkhah, S. Khatiboleslam Sadrnezhad and O. Voznyy, *J. Electroanal. Chem.*, 2022, **914**, 116317.
  53. H. Q. Pham, G. Kim, H. M. Jung and S.-W. Song, *Adv. Funct. Mater.*, 2018, **28**, 1704690.
  54. J. Lee and W. Choi, *J. Electrochem. Soc.*, 2015, **162**, A743.
  55. P. Oh, M. Ko, S. Myeong, Y. Kim and J. Cho, *Adv. Energy Mater.*, 2014, **4**, 1400631.
  56. B. Song, M. O. Lai, Z. Liu, H. Liu and L. Lu, *J. Mater. Chem. A*, 2013, **1**, 9954-9965.
  57. Y. Zhao, Z. Lv, T. Xu and J. Li, *J. Alloys Compd.*, 2017, **715**, 105-111.
  58. W. Guo, Y. Zhang, L. Lin, Y. Liu, M. Fan, G. Gao, S. Wang, B. Sa, J. Lin, Q. Luo, B. Qu, L. Wang, J. Shi, Q. Xie and D.-L. Peng, *Small*, 2023, **19**, 2300175.
  59. Z. Xu, L. Ci, Y. Yuan, X. Nie, J. Li, J. Cheng, Q. Sun, Y. Zhang, G. Han, G. Min and J. Lu, *Nano Energy*, 2020, **75**, 104942.
  60. Q.-Q. Qiao, G.-R. Li, Y.-L. Wang and X.-P. Gao, *J. Mater. Chem. A*, 2016, **4**, 4440-4447.
  61. H. Yu, Y. Gao and X. Liang, *J. Electrochem. Soc.*, 2019, **166**, A2021.
  62. M. Li, H. Wang, L. Zhao, F. Zhang and D. He, *J. Solid State Chem.*, 2019, **272**, 38-46.

63. Y. Bei, Y. Zhang, Y. Li, Y. Song, L. Liu, J. Ma and J. Liu, *J. Alloys Compd.*, 2022, **928**, 167140.
64. Y. Wang, W. Yu, L. Zhao, A. Wu, A. Li, X. Dong and H. Huang, *Electrochim. Acta*, 2023, **462**, 142664.
65. F. Zhao, Y. Tang, J. Wang, J. Tian, H. Ge and B. Wang, *Electrochim. Acta*, 2015, **174**, 384-390.
66. J. Zhong, W. Zhao, M. Zhang, Z.-W. Yin, Z. Zhuo, S. Zhang, M. Zhang, F. Pan, B. Zhang and Z. Lin, *Small*, 2023, **19**, 2300802.
67. S.-D. Zhang, M.-Y. Qi, S. Guo, Y.-G. Sun, T.-T. Wu, H.-S. Zhang, S.-Q. Lu, F. Meng, Q. Zhang, L. Gu, Z. Zhao, Z. Peng, H. Jin, H. Ji, Y.-R. Lu, T.-S. Chan, R. Duan and A.-M. Cao, *Energy Storage Mater.*, 2023, **57**, 289-298.
68. H. Lee, M. G. Kim and J. Cho, *Electrochemistry Communications*, 2007, **9**, 149-154.
69. Y. Li, M. Zan, P. Chen, Y. Huang, X. Xu, C. Zhang, Z. Cai, X. Yu and H. Li, *ACS Appl. Mater. Interfaces*, 2023, **15**, 51262-51273.
70. W. Sun, J. Yang, W. Shi, H. Zheng, Y. Cheng and X. Xu, *ACS Appl. Energy Mater.*, 2024, **7**, 6585-6597.
71. X. Zhang, B. Peng, L. Zhao, G. Wan, F. Wang, S. Zeng, H. Zhang, J. Ding and G. Zhang, *ACS Appl. Mater. Interfaces*, 2022, **14**, 16204-16213.
72. Z. Lin, Y. Ying, Z. Xu, G. Chen, X. Gong, Z. Wang, D. Guan, L. Zhao, M. Yang, K. Fan, T. Liu, H. Li, H. Zhang, H. Li, X. Zhang, Y. Zhu, Z. Lu, Z. Shao, P. Hou and H. Huang, *Energy Environ. Sci.*, 2025, **18**, 334-346.
73. Y. Li, H. Pan, L. Gan, M. Zan, Y. Huang, B. Wang, B. Deng, T. Wang, X. Yu, B. Wang, H. Li and X. Huang, *Energy Storage Mater.*, 2024, **67**, 103290.
74. J. Yao, Y. Li, T. Xiong, Y. Fan, L. Zhao, X. Cheng, Y. Tian, L. Li, Y. Li and W. Zhang, *Angew. Chem. Int. Ed.*, 2024, **136**, e202407898.
75. L. Xu, S. Cheng, H. Niu and Z. Wang, *Electrochim. Acta*, 2024, **478**, 143862.
76. Y. Zhao, W. Zeng, S. Su, J. Wu, J. Ke, Y. Sun and X. Lin, *ACS Appl. Mater. Interfaces*, 2024, **16**, 60448-60457.
77. Z. Bi, Z. Yi, L. Zhang, G. Wang, A. Zhang, S. Liao, Q. Zhao, Z. Peng, L. Song, Y. Wang, Z. Zhao, S. Wei, W. Zhao, X. Shi, M. Li, N. Ta, J. Mi, S. Li, P. Das, Y. Cui, C. Chen, F. Pan and Z.-S. Wu, *Energy Environ. Sci.*, 2024, **17**, 2765-2775.
78. Q. Ding, Z. Jiang, K. Chen, H. Li, J. Shi, X. Ai and D. Xia, *Carbon Energy*, 2024, e602.
79. Z. Liu, M. Han, S. Zhang, H. Li, X. Wu, Z. Fu, H. Zhang, G. Wang and Y. Zhang, *Adv. Mater.*, 2024, **36**, 2404188.
80. L. Gao, F. Li, G. Zeng, X. Jin, Z. Li and C. Wang, *Adv. Funct. Mater.*, **n/a**, 2416338.
81. Y. Leng, S. Dong, Y. Sun, L. Ma, J. Li, H. Feng, C. Hai and Y. Zhou, *Langmuir*, 2024, **40**, 6295-6303.
82. X. Zhou, C.-Y. Chang, D. Yu, K. Zhang, Z. Li, S.-K. Jiang, Y. Zhu, Y. Xia, B. J. Hwang and Y. Wang, *Nat. Commun.*, 2025, **16**, 112.
83. J.-K. Liu, G.-D. Bai, Z.-W. Yin, L. Deng, W.-J. Sun, Z. Wang, G.-Y. Bai, Y.-X. Luo, Z.-L. Jin, Y. Zhou, J.-T. Li and S.-G. Sun, *Chem. Commun.*, 2025, DOI: 10.1039/D4CC05449K.
84. Y. Zhao, W. Zeng, S. Qin, S. Su, J. Wu, J. Ke, Y. Sun, K. Liu and X. Lin, *J. Alloys Compd.*, 2024, **989**, 174377.
85. Z. Meng, H. Wang, Y. Wang, H. Zhang, Q. Xiang, Y. Zheng, H. Yuan, J. Huang, T. Fan and Y. Min, *J. Alloys Compd.*, 2024, **1005**, 176087.
86. X. Li, J. Lyu, F. Du, K. Wang, M. Tian, X. Zhang, S.-W. Yang, Z. Hao, J. Zheng and G. Q. Xu, *Nano Energy*, 2025, **133**, 110496.
87. Y. Shao, J. Xu, A. Amardeep, Y. Xia, X. Meng, J. Liu and S. Liao, *Small Methods*, 2024, **8**, e2400256.
88. S. Gao, B. Shi, J. Liu, L. Wang, C. Zhou, C. Guo, J. Zhang and W. Li, *ACS Sustainable Chem. Eng.*, 2021, **9**, 5322-5333.
89. J. Shen, B. Zhang, X. He, B. Xiao, Z. Xiao, X. Li and X. Ou, *J. Colloid Interface Sci.*, 2023, **629**,

- 388-398.
90. W. Wang, L. Wu, Z. Li, K. Huang, Z. Chen, C. Lv, H. Dou and X. Zhang, *Chemelectrochem*, 2021, **8**, 2014-2021.
  91. G. Ding, F. Yan, Z. Zhu, J. Chen, Z. Hu, G. Li, J. Liu, L. Gao, W. Jiang and F. sun, *Ceram. Int.*, 2022, **48**, 5714-5723.
  92. Y. Li, C. Yu, C. Xu, W. Liu, M. Dang, H. Jin, W. Li and J. Zhang, *Ionics*, 2021, **27**, 3239-3249.
  93. Q. Li, G. Yang, Y. Chu, C. Tan, Q. Pan, F. Zheng, Y. Li, S. Hu, Y. Huang and H. Wang, *Electrochim. Acta*, 2021, **372**, 137882.
  94. W. Liu, X. Li, D. Xiong, Y. Hao, J. Li, H. Kou, B. Yan, D. Li, S. Lu, A. Koo, K. Adair and X. Sun, *Nano Energy*, 2018, **44**, 111-120.
  95. J. Wu, X. Tan, J. Zhang, L. Guo, Y. Jiang, S. Liu, T. Zhao, Y. Liu, J. Ren, H. Wang, X. Kang and W. Chu, *Energy Technol.*, 2019, **7**, 209-215.
  96. H. Wang, Y. Chu, Q. Pan, G. Yang, A. Lai, Z. Liu, F. Zheng, S. Hu, Y. Huang and Q. Li, *Electrochim. Acta*, 2021, **366**, 137476.
  97. G. Li, L. You, Y. Wen, C. Zhang, B. Huang, B. Chu, J.-H. Wu, T. Huang and A. Yu, *ACS Appl. Mater. Interfaces*, 2021, **13**, 10952-10963.
  98. H. Wang, Y. Chu, Q. Pan, C. Tan, Y. Shi, Y. Li, S. Hu, F. Zheng, Y. Huang and Q. Li, *ACS Sustainable Chem. Eng.*, 2021, **9**, 8951-8961.
  99. X. Zhang, G. Hu, Y. Cao, Z. Peng, W. Wang, C. Tan, Y. Wang and K. Du, *Electrochim. Acta*, 2021, **383**, 138297.
  100. G. Yang, K. Pan, F. Lai, Z. Wang, Y. Chu, S. Yang, J. Han, H. Wang, X. Zhang and Q. Li, *Chem. Eng. J.*, 2021, **421**, 129964.
  101. Z. Ahaliabadeh, V. Miikkulainen, M. Mäntymäki, S. Mousavihashemi, J. Lahtinen, Y. Lide, H. Jiang, K. Mizohata, T. Kankaanpää and T. Kallio, *ACS Appl. Mater. Interfaces*, 2021, **13**, 42773-42790.
  102. Y. Xie, F. Guo and Y. Zhang, *Appl. Surf. Sci.*, 2022, **595**, 153479.
  103. Z. Shao, Y. Liu, Y. Chen, Z. Yu and J. Li, *Ionics*, 2020, **26**, 1173-1180.
  104. Y. Liu, X. Wang, S. K. Ghosh, M. Zou, H. Zhou, X. Xiao and X. Meng, *Dalton Trans.*, 2022, **51**, 2737-2749.
  105. L. Yao, F. Liang, J. Jin, B. V. R. Chowdari, J. Yang and Z. Wen, *Chem. Eng. J.*, 2020, **389**, 124403.
  106. Z. Cheng, F. Lv, N. Xu, Y. Liu, H. Xie, M. Wu, Y. Ma, Y. Zhang and L. Chen, *Appl. Surf. Sci.*, 2020, **524**, 146556.
  107. F. Zhao, X. Li, Y. Yan, M. Su, L. Liang, P. Nie, L. Hou, L. Chang and C. Yuan, *J. Power Sources*, 2022, **524**, 231035.
  108. L. Musuvadhi Babulal, C. C. Yang, S.-h. Wu, W.-C. Chien, R. Jose and S. Jessie Lue, *Chem. Eng. J.*, 2021, **413**, 127150.
  109. W. Liu, X. Li, Y. Hao, H. Maleki Kheimeh Sari, J. Qin, W. Xiao, X. Wang, H. Yang, W. Li, L. Kou, Z. Tian, L. Shao, C. Zhang and J. Zhang, *ACS Appl. Energy Mater.*, 2020, **3**, 3242-3252.
  110. L. Wang, J. Liang, X. Zhang, S. Li, T. Wang, F. Ma, J. Han, Y. Huang and Q. Li, *Nanoscale*, 2021, **13**, 4670-4677.
  111. Z. Zhu, A. Gao, Y. Liang, F. Yi, T. Meng, J. Ling, J. Hao and D. Shu, *ACS Sustainable Chem. Eng.*, 2022, **10**, 50-60.
  112. P. Zou, Z. Lin, M. Fan, F. Wang, Y. Liu and X. Xiong, *Appl. Surf. Sci.*, 2020, **504**, 144506.
  113. H. Gupta, S. K. Singh, N. Srivastava, D. Meghni, R. K. Tiwari, R. Mishra, A. Patel, A. Tiwari, A. L. Saroj and R. K. Singh, *ACS Appl. Energy Mater.*, 2021, **4**, 13878-13889.
  114. Y. Li, L. Cui, C. Tan, X. Fan, Q. Pan, Y. Chu, S. Hu, F. Zheng, H. Wang and Q. Li, *Chem. Eng. J.*, 2022, **430**, 132985.
  115. S. Jamil, Q. Ran, L. Yang, Y. Huang, S. Cao, X. Yang and X. Wang, *Chem. Eng. J.*, 2021, **407**, 126442.
  116. Y. Wang, B.-N. Liu, G. Zhou, K.-H. Nie, J.-N. Zhang, X.-Q. Yu and H. Li, *Chin. Phys. B*, 2019, **28**,

- 068202.
117. Y.-D. Huang, H.-X. Wei, P.-Y. Li, Y.-H. Luo, Q. Wen, D.-H. Le, Z.-J. He, H.-Y. Wang, Y.-G. Tang, C. Yan, J. Mao, K.-H. Dai, X.-H. Zhang and J.-C. Zheng, *J. Energy Chem.*, 2022, **75**, 301-309.
  118. M. Liu, J. Zhou, T. Cheng, Z. Feng, Y. Qin and B. Guo, *ACS Appl. Energy Mater.*, 2022, **5**, 9181-9188.
  119. Z. Wang, H. Zhong and G. Song, *J. Alloys Compd.*, 2020, **849**, 156467.
  120. R. Wang, Y. Zhang, Z. Li, L. Wu, J. Chen, X. Liu, H. Hu, H. Ding, S. Cao, Q. Wei and X. Wang, *J. Energy Chem.*, 2025, **101**, 630-640.
  121. Q. Fan, Z. Chen, W. Ma and Z. Shi, *Appl. Mater. Today*, 2025, **42**, 102559.
  122. C. Li, J. Liu, Y. Su, J. Dong, H. Zhang, M. Wang, Y. Guan, K. Yan, N. Liu, Y. Lu, N. Li, Y. Su, F. Wu and L. Chen, *Energy Storage Mater.*, 2025, **74**, 103893.
